# Supplementary material for: Comparative Transcriptome Analysis Reveals the Molecular Immunopathogenesis of Chinese Soft-Shelled Turtle (Trionyx sinensis) Infected with Aeromonas hydrophila
Source: MDPI journal article supplement (doi:10.3390/biology10111218), 2021-11-22
Supplement: s1 [file s1]

**Supplementary Table S6. The sequence information of primers for qPCR.**

| Gene name                    | Forward primer (5'-3') | Reverse primer (5'-3') |
|------------------------------|------------------------|------------------------|
| <i>IKBKE</i>                 | CGATAGCCGCTTGTAACGTG   | ACCTGGGCCAAATTCGGTTT   |
| <i>CXCL10</i>                | ACCAATCAGCGTCAAGGAGG   | CTGCGAGAGGTTGAGGAGTG   |
| <i>IL1<math>\beta</math></i> | CTGGCTTGCAGAGACCGT     | CAGCCTCACTTGGTGTTGGA   |
| <i>IL8</i>                   | GCAAAGTCCTTGTTGCTGGG   | TCTGTGTCAGCTTCACGTCC   |
| <i>IRF7</i>                  | ATGGACTCTGGATGGAGGCT   | AAGGAATCGGCTGTTCTGGG   |
| <i>MAP2K6</i>                | TTCCGGCAGACAAGTTCTCC   | GCCACGTCTGTCTCTTTGGA   |
| <i>CXCL11</i>                | CCCTCTGAACGATACACTCCA  | TGCCATTCTTGTCAGCAGAT   |
| <i>MyD88</i>                 | TGTGTCTTGCAAGAGGAC     | CATCAAACAGCTCTGGCGTG   |
| <i>TLR8</i>                  | CCCCTACCCATGTGAACCTT   | GAGAGGTGCTGGAGAGGTTT   |
