# Supplementary material for: Comparative Transcriptome Analysis Reveals the Molecular Immunopathogenesis of Chinese Soft-Shelled Turtle (Trionyx sinensis) Infected with Aeromonas hydrophila
Source: MDPI journal article supplement (doi:10.3390/biology10111218), 2021-11-22
Supplement: s1 [file s1]

**Supplementary Table S1. Details of RNA-Seq data.**

| Sample Name | Tissue | Hpi | Group    | Clean reads | Clean bases    | Mapping rate (%) | Q30 (%) |
|-------------|--------|-----|----------|-------------|----------------|------------------|---------|
| L0h         | liver  | 0h  | control  | 21,169,314  | 6,331,476,518  | 80.08            | 93.16   |
| AL6h        | liver  | 6h  | active   | 25,543,078  | 7,636,810,006  | 82.51            | 93.98   |
| AL24h       | liver  | 24h | active   | 25,598,000  | 2,285,9624,798 | 83.53            | 93.76   |
| AL72h       | liver  | 72h | active   | 25,280,622  | 2,2681,617,450 | 82.52            | 93.50   |
| IL6h        | liver  | 6h  | inactive | 24,315,264  | 7,265,318,350  | 82.77            | 93.43   |
| IL24h       | liver  | 24h | inactive | 27,987,993  | 8,363,911,033  | 81.17            | 93.27   |
| IL72h       | liver  | 72h | inactive | 28,262,185  | 8,442,516,054  | 82.71            | 93.99   |
| S0h         | spleen | 0h  | control  | 23,303,214  | 6,960,655,810  | 81.67            | 93.23   |
| AS6h        | spleen | 6h  | active   | 24,511,961  | 7,330,036,160  | 80.14            | 93.72   |
| AS24h       | spleen | 24h | active   | 21,683,974  | 6,456,128,289  | 82.50            | 93.63   |
| AS72h       | spleen | 72h | active   | 26,401,102  | 7,560,539,150  | 82.32            | 93.62   |
| IS6h        | spleen | 6h  | inactive | 29,571,593  | 8,841,001,329  | 80.59            | 93.68   |
| IS24h       | spleen | 24h | inactive | 29,501,061  | 8,810,760,554  | 79.65            | 93.27   |
| IS72h       | spleen | 72h | inactive | 29,617,004  | 8,822,691,248  | 82.59            | 93.92   |
